# Supplementary material
Source: publisher figshare collection journal article supplement (https://acs.figshare.com/ndownloader/files/4368061)
Supplement: Supplementary file 1 [file 4368061]

## Supplementary Information of the manuscript:

### Two-dimensional Self-Assembly of Linear Molecular Rods at Liquid/Solid Interface

Zhongcheng Mu,<sup>a,b</sup> Lijin Shu,<sup>c,d</sup> Harald Fuchs,<sup>a</sup> Marcel Mayor<sup>\*c,d,e</sup> and Lifeng Chi<sup>\*a</sup>

<sup>a</sup>Physikalisches Institut, Westfaelische Wilhelm-Universitaet Muenster, Wilhelm-Klemm-Str. 10, 48149 Muenster, Germany. E-mail: chi@uni-muenster.de

<sup>b</sup>Faculty of Chemistry, Northeast Normal University, 130024 Changchun, Jilin, P.R. China

<sup>c</sup>Karlsruhe Institute of Technology (KIT), Institute for Nanotechnology, Postfach 3640, 76021 Karlsruhe, Germany  
E-mail: marcel.mayor@kit.edu

<sup>d</sup>DFG Center for Functional Nanostructures (CFN), 76028 Karlsruhe, Germany.

<sup>e</sup>Universität Basel Departement Chemie, St. Johannisring 19, 4056 Basel, Switzerland.  
E-mail: marcel.mayor@unibas.ch

**Synthesis and characterization of the molecular rods 1-5:** The synthesis of the molecular rods **1-5** is displayed in scheme 1.

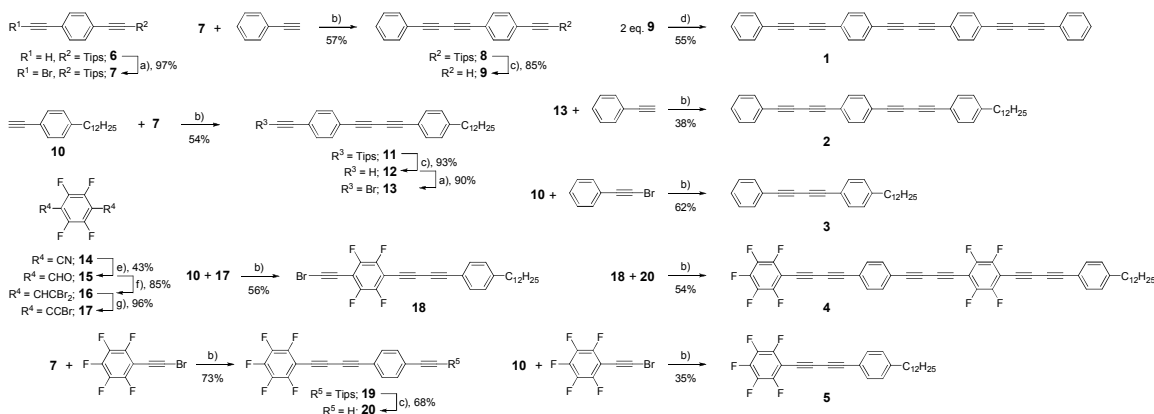

**Scheme 1:** Synthesis of the molecular rods **1-5**. a) NBS, AgNO<sub>3</sub>, CH<sub>3</sub>COCH<sub>3</sub>, r.t.; b) Pd<sub>2</sub>(dba)<sub>3</sub>·CHCl<sub>3</sub>, CuI, C<sub>6</sub>H<sub>5</sub>CH<sub>3</sub>, EtN(*i*-prop.)<sub>2</sub>, r.t.; c) TBAF, wet THF, r.t.; d) PdCl<sub>2</sub>(PPh<sub>3</sub>)<sub>2</sub>, CuI, THF, EtN(*i*-prop.)<sub>2</sub>, r.t.; e) DIBAL-H, C<sub>6</sub>H<sub>5</sub>CH<sub>3</sub>, r.t.; f) CBr<sub>4</sub>, Zn, PPh<sub>3</sub>, CH<sub>2</sub>Cl<sub>2</sub>, r.t.; g) aq. KOH, BTEAC, THF, r.t.

## Experimental Protocols

**General Remarks:** All reagents were purchased from Aldrich and used without further purification. Dry toluene was obtained by distillation from a Na/benzophenone slurry. Bromoethynylpentafluorobenzene,<sup>[1]</sup> mono TIPS-protected 1,4-diethynylbenzene **6**,<sup>[2]</sup> bromoethynylbenzene,<sup>[3]</sup> the molecular rod **5**<sup>[1]</sup> and its precursor **10**<sup>[1]</sup> were prepared according to reported procedures. Unless otherwise noted, all reactions were carried out under a N<sub>2</sub> protection gas atmosphere. <sup>1</sup>H-, <sup>13</sup>C- and <sup>19</sup>F-NMR spectra were recorded on a Bruker Ultra Shield 400 MHz. MALDI-TOF MS spectrometry was performed with a PerSeptive Biosystems Voyager –DE PRO time-off-flight mass spectrometer. Thin layer chromatography (TLC) was carried out on 20 Merck silica gel 60 F254 plates and Merck silica gel 60 (0.040-0.063 mm) was used for column chromatography (CC). Elemental analyses (EA) were recorded using a ThermoQuest FlashEA 1112 N/Protein Analyzer.

**((4-(bromoethynyl)phenyl)ethynyl)triisopropylsilane 7:** A suspension of **6** (0.80 g, 2.84 mmol), N-bromosuccinimide (0.60 g, 3.4 mmol) and silver nitrate (0.01 g, 0.06 mmol) in acetone (60 mL) was stirred for 2 h at RT. Removal of the solvent and CC (silica, hexane) gave **7** (1.0 g, 2.77 mmol, 97%) as slightly yellow oil. <sup>1</sup>H NMR (300 MHz, CDCl<sub>3</sub>)  $\delta$  1.15 (s, 21H), 7.41 (q, 4H). <sup>13</sup>C-NMR (75 MHz, CDCl<sub>3</sub>)  $\delta$  11.30, 18.64, 51.72, 79.76, 93.14, 106.40, 122.49, 123.86, 131.76, 131.91. EI-MS 70 eV, m/z: 363.1 (25) [M]<sup>+</sup>, 362.1 (100) [M]<sup>+</sup>, 361.1 (24) [M]<sup>+</sup>, 360.1 (98) [M]<sup>+</sup>. C<sub>19</sub>H<sub>25</sub>BrSi (361.39): calcd. C 63.15, H 6.97; found C 62.96, H 6.87.

**triisopropyl((4-(phenylbuta-1,3-diynyl)phenyl)ethynyl)silane 8:** A suspension of **7** (0.33 g, 0.91 mmol), ethynylbenzene (0.15 g, 1.47 mmol), Pd<sub>2</sub>(dba)<sub>3</sub>·CHCl<sub>3</sub> (0.04 g, 0.04 mmol), CuI (0.03 g, 0.16 mmol), N-ethyldiisopropylamine (1 ml) in toluene (20 ml) was degassed with nitrogen and stirred at room temperature for 2 hours. After removal of solvents, CC over silica gel with hexane as eluent provided **8** (0.20 g, 0.52 mmol, 57%) as slightly yellow oil. <sup>1</sup>H-NMR (300 MHz, CDCl<sub>3</sub>)  $\delta$  1.13 (s, 21 H), 7.40 (m, 3H), 7.51 (br, 4H), 7.60 (m, 2H). <sup>13</sup>C-NMR (75 MHz, CDCl<sub>3</sub>)  $\delta$  11.30, 18.63, 73.82, 75.75, 81.05, 82.50, 93.69, 106.43, 121.64, 122.23, 124.25, 128.38, 129.45 132.10, 132.35, 132.58.

MALDI-ToF MS:  $m/z$ : 382.15  $[M]^+$ .  $C_{27}H_{30}Si$  (382.61): calcd. C 84.76, H 7.90; found C 84.91, H 7.82.

**1-ethynyl-4-(phenylbuta-1,3-diynyl)benzene 9**: TBAF (0.20 g, 0.61 mmol) in THF (15 mL) was added to the stirred solution of **8** (0.18 g, 0.47 mmol) in wet THF (15 mL). After 2 h stirring at RT, the solvent was removed and CC (silica, hexane) provided **9** (90 mg, 0.40 mmol, 85%) as white solid.  $^1H$ -NMR (300 MHz,  $CDCl_3$ )  $\delta$  3.17 (s, 1H), 7.36 (m, 3H), 7.47 (br, 4H), 7.53 (m, 2H).  $^{13}C$ -NMR (75 MHz,  $CDCl_3$ )  $\delta$  73.79, 75.91, 79.63, 80.84, 82.64, 83.06, 121.71, 122.31, 122.96, 128.45, 129.32, 132.12, 132.32, 132.53. MALDI-ToF MS:  $m/z$ : 226.35  $[M]^+$ .  $C_{18}H_{10}$  (226.27): calcd. C 95.55, H 4.45; found C 95.13, H 4.35.

**1,4-bis(4-(phenylbuta-1,3-diynyl)phenyl)buta-1,3-diyne 1**: **9** (0.15 g, 0.66 mmol),  $Pd(PPh_3)_2Cl_2$  (0.05 g, 0.07 mmol), CuI (0.015 g, 0.08 mmol), EtN(*i*-prop) $_2$  (1 mL) in THF (50 mL) was stirred for 20 h under air. CC (hexane) and SEC (toluene as eluent) yielded **1** (0.08 g, 0.18 mmol, 55%) as a white solid.  $^1H$ -NMR (300 MHz,  $CDCl_3$ )  $\delta$  7.37 (m, 6H), 7.47 (br, 4H), 7.54 (br, 8H). MALDI-ToF MS:  $m/z$ : 450.04  $[M]^+$ .  $C_{36}H_{18}$  (450.53): calcd. C 95.97, H 4.03; found C 95.79, H 4.01.

**((4-((4-dodecylphenyl)buta-1,3-diynyl)phenyl)ethynyl)triisopropylsilane 11**: **10** (0.135 g, 0.5 mmol), **7** (0.18 g, 0.5 mmol),  $Pd_2(dba)_3 \cdot CHCl_3$  (0.02 g, 0.02 mmol) and CuI (0.015 g, 0.08 mmol), in N-ethyl-diisopropylamine (1.5 mL) and toluene (35 mL) was degassed with nitrogen and stirred at room temperature for 24 hours. After removal of solvents, CC (silica gel, hexane) provided **11** (0.15 g, 0.27 mmol, 54%) as a slightly yellow liquid.  $^1H$ -NMR (300 MHz,  $CDCl_3$ )  $\delta$  0.90 (t, 3H), 1.14 (br, 21H), 1.27 (br, 16H), 1.32 (q, 2H), 1.61 (q, 2H), 2.64 (t, 2H), 7.15 (d, 2H), 7.26 (t, 2H), 7.45 (m, 6H).  $^{13}C$ -NMR (75 MHz,  $CDCl_3$ )  $\delta$  11.28, 14.13, 18.64, 22.70, 29.25, 29.37, 29.47, 29.57, 29.65, 29.68, 31.16, 31.93, 36.01, 73.19, 75.90, 80.75, 82.92, 93.69, 106.42, 118.71, 121.72, 124.18, 128.58, 131.98, 132.19, 132.45, 144.75. MALDI-ToF MS:  $m/z$ : 549.25  $[M-H]^+$ .  $C_{39}H_{54}Si$  (550.93): calcd. C 85.02, H 9.88; found C 85.38, H 10.04.

**1-dodecyl-4-((4-ethynylphenyl)buta-1,3-diynyl)benzene 12:** TBAF (0.1 g, 0.3 mmol) in THF (30 mL) was added to the stirred solution of **11** (0.15 g, 0.27 mmol) in wet THF (15 mL) over 2 h at RT. The solvent was removed and CC (silica, hexane) yielded **12** (98 mg, 0.25 mmol, 93%) as a white solid.  $^1\text{H-NMR}$  (300 MHz,  $\text{CDCl}_3$ )  $\delta$  0.88 (t, 3H), 1.26 (br, 16H), 1.30 (q, 2H), 1.60 (q, 2H), 2.61 (t, 2H), 3.20 (s, 1H), 7.15 (d, 2H), 7.43 (d, 2H), 7.45 (q, 4H).  $^{13}\text{C-NMR}$  (75 MHz,  $\text{CDCl}_3$ )  $\delta$  14.10, 22.68, 29.24, 29.35, 29.46, 29.56, 29.63, 29.66, 31.13, 31.92, 35.99, 73.14, 76.08, 79.58, 80.46, 83.00, 83.04, 118.63, 122.38, 122.74, 128.57, 132.07, 132.27, 132.46, 144.79. MALDI-ToF MS:  $m/z$ : 393.85  $[\text{M-H}]^+$ .  $\text{C}_{30}\text{H}_{34}$  (394.59): calcd. C 91.32, H 8.68; found C 91.36, H 8.22.

**1-(bromoethynyl)-4-((4-dodecylphenyl)buta-1,3-diynyl)benzene 13:** A suspension of **12** (0.20 g, 0.51 mmol), N-bromosuccinimide (0.10 g, 0.56 mmol) and silver nitrate (0.01 g, 0.06 mmol) in acetone (100 mL) was stirred for 1.5 h at RT. Removal of the solvent and CC (silica, hexane) gave **13** (0.22 g, 0.46 mmol, 90%) as slightly yellow solid.  $^1\text{H-NMR}$  (300 MHz,  $\text{CDCl}_3$ )  $\delta$  0.90 (t, 3H), 1.27 (br, 16H), 1.31 (q, 2H), 1.61 (q, 2H), 2.61 (t, 2H), 7.15 (d, 2H), 7.43 (d, 2H), 7.45 (q, 4H).  $^{13}\text{C-NMR}$  (75 MHz,  $\text{CDCl}_3$ )  $\delta$  14.11, 22.68, 29.23, 29.35, 29.45, 29.55, 29.63, 29.66, 31.14, 31.91, 36.01, 52.66, 73.13, 76.19, 79.61, 80.49, 83.09, 118.64, 122.25, 123.32, 128.60, 131.96, 132.32, 132.47, 144.85. EI MS: 70 eV,  $m/z$ : 475.20 (32)  $[\text{M}]^+$ , 474.20 (97)  $[\text{M}]^+$ , 473.20 (33)  $[\text{M}]^+$ , 472.20 (100)  $[\text{M}]^+$ .  $\text{C}_{30}\text{H}_{33}\text{Br}$  (473.49): calcd. C 76.10, H 7.02; found C 75.96, H 6.77.

**1-dodecyl-4-((4-(phenylbuta-1,3-diynyl)phenyl)buta-1,3-diynyl)benzene 2: 13** (0.20 g, 0.42 mmol), ethynylbenzene (0.05 g, 0.49 mmol),  $\text{Pd}_2(\text{dba})_3\cdot\text{CHCl}_3$  (0.02 g, 0.02 mmol), CuI (0.015 g, 0.08 mmol), N-ethyldiisopropylamine (1 ml) in toluene (25 ml) was degassed with nitrogen and stirred at room temperature for 24 hours. After removal of solvent, CC (silica gel, hexane) followed by SEC (biobeads, toluene) gave **2** (78 mg, 0.16 mmol, 38%) as a slightly yellow solid.  $^1\text{H-NMR}$  (300 MHz,  $\text{CDCl}_3$ )  $\delta$  0.90 (t, 3H), 1.28 (br, 16H), 1.31 (q, 2H), 1.62 (q, 2H), 2.62 (t, 2H), 7.16 (d, 2H), 7.36 (br, 3H), 7.45 (d, 2H), 7.48 (s, 4H), 7.54 (m, 2H).  $^{13}\text{C-NMR}$  (75 MHz,  $\text{CDCl}_3$ )  $\delta$  14.04, 22.68, 29.26,

29.34, 29.46, 29.56, 29.64, 29.66, 31.08, 31.94, 36.05, 73.27, 73.88, 76.54, 76.86, 80.58, 80.95, 83.00, 83.50, 118.82, 121.81, 122.59, 122.91, 128.49, 128.63, 129.36, 132.43, 132.45, 132.54, 132.58, 144.91. MALDI-ToF MS: m/z: 493.59 [M-H]<sup>+</sup>. C<sub>38</sub>H<sub>38</sub> (494.71): C 92.26, H 7.74; found C 91.29, H 8.11.

**1-dodecyl-4-(phenylbuta-1,3-diynyl)benzene 3:** A mixture of **10** (0.22 g, 0.81 mmol), Bromoethynyl benzene (0.20 g, 1.1 mmol), Pd<sub>2</sub>(dba)<sub>3</sub>·CHCl<sub>3</sub> (0.04 g, 0.04 mmol), CuI (0.03 g, 0.16 mmol), N-ethyldiisopropylamine (1 ml) in toluene (25 ml) was degassed with nitrogen and stirred at room temperature for 24 hours. After removal of solvent, CC (silica gel, hexane) and SEC (biobeads, toluene) yielded **3** (0.18 g, 0.50 mmol, 62%) as white solid. <sup>1</sup>H-NMR (300 MHz, CDCl<sub>3</sub>) δ 0.91 (t, 3H), 1.28 (br, 16H), 1.31 (q, 2H), 1.62 (q, 2H), 2.62 (t, 2H), 7.16 (d, 2H), 7.34 (m, 1H), 7.37 (m, 2H), 7.46 (d, 2H), 7.55 (m, 2H). <sup>13</sup>C-NMR (75 MHz, CDCl<sub>3</sub>) δ 14.13, 22.70, 29.24, 29.36, 29.47, 29.57, 29.64, 29.67, 31.17, 31.91, 35.98, 73.26, 74.08, 81.15, 81.90, 118.75, 121.86, 128.37, 128.53, 129.04, 132.39, 132.41, 144.60. MALDI-ToF MS: m/z: 370.05 [M]<sup>+</sup>. C<sub>28</sub>H<sub>34</sub> (370.57): calcd. C 90.75, H 9.25; found C 90.70, H 9.26.

**2,3,5,6-tetrafluoroterephthalaldehyde 15:** To a solution of **14** (5.4 g, 27.0 mmol) in dry toluene (250 mL) at 0 °C, a 1.5 M diisopropylaluminium-hydride toluene solution (50 mL) was added dropwise in 2 h. After 3 h stirring at RT, the reaction mixture was cooled to 0 °C and EtOAc (10 mL) and 2N HCl (150 mL) was added. The organic layer was separated and the aqueous one was extracted with CH<sub>2</sub>Cl<sub>2</sub>. Removal of the solvents followed by CC (silica, hexane/ethylacetate: 2/1) provided **15** (2.4 g, 11.7 mmol, 43%) as white solid. <sup>1</sup>H-NMR (300 MHz, CDCl<sub>3</sub>) δ 10.36 (s, 2H). <sup>13</sup>C-NMR (75 MHz, CDCl<sub>3</sub>) δ 119.21 (m), 146.85 (d, m, J<sub>d</sub> 270.1 Hz), 182.02. <sup>19</sup>F-NMR (376.5 MHz, CDCl<sub>3</sub>) δ -144.81. EI-MS: 70 eV, m/z: 206.0 (100) [M]<sup>+</sup>, 205.0 (41) [M]<sup>+</sup>, 177.0 (29) [M-CHO]<sup>+</sup>, 149.0 (40) [M-2CHO]<sup>+</sup>. C<sub>8</sub>H<sub>2</sub>F<sub>4</sub>O<sub>2</sub> (206.09): calcd. C 46.62, H 0.98; found 46.47, H 0.94.

**1,4-bis(2,2-dibromovinyl)-2,3,5,6-tetrafluorobenzene 16:** To a suspension of CBr<sub>4</sub> (6.67 g, 20 mmol)

and zinc powder (1.3 g, 20 mmol) in dry  $\text{CH}_2\text{Cl}_2$  (15 mL), a solution of  $\text{PPh}_3$  (5.3 g, 20 mmol) in dry  $\text{CH}_2\text{Cl}_2$  (50 mL) was added dropwise over 3 h at RT. After completed addition, the mixture was allowed to stir for 18 h. Subsequently, a solution of **15** (1.0 g, 4.8 mmol) in dry  $\text{CH}_2\text{Cl}_2$  (20 mL) was added to the above suspension. After 2 h stirring, the suspension was filtered through a short silica plug with  $\text{CH}_2\text{Cl}_2$ . CC (silica, hexane) provided **16** (2.1 g, 4.06 mmol, 85%) as white solid.  $^1\text{H-NMR}$  (300 MHz,  $\text{CDCl}_3$ )  $\delta$  7.24 (s, 2H).  $^{13}\text{C-NMR}$  (75 MHz,  $\text{CDCl}_3$ )  $\delta$  99.67, 115.23 (m), 123.62, 143.09 (d, m,  $J_d$  251.2 Hz).  $^{19}\text{F-NMR}$  (376.5 MHz,  $\text{CDCl}_3$ )  $\delta$  -138.70. EI-MS: 70 eV,  $m/z$  519.6 (63)  $[\text{M}]^+$ , 517.6 (100)  $[\text{M}]^+$ , 515.6 (67)  $[\text{M}]^+$ , 359.8 (23)  $[\text{M}-2\text{Br}]^+$ , 357.8 (47)  $[\text{M}-2\text{Br}]^+$ , 355.8 (24)  $[\text{M}-2\text{Br}]^+$  198.0 (79)  $[\text{M}-4\text{Br}]^+$ .  $\text{C}_{10}\text{H}_2\text{F}_4\text{Br}_4$  (517.73): calcd. C 23.20, H 0.39; found C 23.28, H 0.39.

**1,4-bis(bromoethynyl)-2,3,5,6-tetrafluorobenzene 17:** A solution of KOH (7 g, 0.125 mol) in water (9 mL) was dropped to the stirred mixture of **16** (8.5 g, 16.4 mmol) and benzytriethylammonium-chloride (0.1 g, 0.44 mmol) in THF (20 mL) at RT over 1 h. After being stirred for 2 h, the organic layer was separated and washed with saturated aqueous  $\text{NaHCO}_3$ . CC (silica, hexane) afforded **17** (5.6 g, 15.7 mmol, 96%) as a white solid.  $^{13}\text{C-NMR}$  (75 MHz,  $\text{CDCl}_3$ )  $\delta$  65.32, 65.62 (m), 104.70 (m), 147.54 (d, m,  $J_d$  254.3 Hz).  $^{19}\text{F-NMR}$  (376.5 MHz,  $\text{CDCl}_3$ )  $\delta$  -137.82. EI-MS: 70 eV (100 °C)  $m/z$  357.8 (49)  $[\text{M}]^+$ , 355.8 (100)  $[\text{M}]^+$ , 353.8 (50)  $[\text{M}]^+$  196.0 (64)  $[\text{M}-2\text{Br}]^+$ .  $\text{C}_{10}\text{Br}_2\text{F}_4$  (355.91): calcd. C 33.75; found C 33.61.

**1-(bromoethynyl)-4-((4-dodecylphenyl)buta-1,3-diynyl)-2,3,5,6-tetrafluorobenzene 18:** A suspension of **17** (3.7 g, 10.4 mmol), **10** (0.7 g, 2.6 mmol),  $\text{Pd}_2(\text{dba})_3 \cdot \text{CHCl}_3$  (0.10 g, 0.10 mmol) and CuI (0.06 g, 0.32 mmol) in N-ethyldiisopropylamine (3 mL) and toluene (50 mL) was degassed with  $\text{N}_2$  and stirred for 4 hours at RT. Removal of solvent and CC (silica gel, hexane) gave **18** (0.80 g, 1.47 mmol, 56%) as yellow solid.  $^1\text{H-NMR}$  (300 MHz,  $\text{CDCl}_3$ )  $\delta$  0.89 (t, 3H), 1.26 (br, 16H), 1.29 (m, 2H), 1.61 (q, 2H), 2.62 (t, 2H), 7.17 (d, 2H), 7.46 (d, 2H).  $^{13}\text{C-NMR}$  (75 MHz,  $\text{CDCl}_3$ )  $\delta$  14.10, 22.69, 29.25, 29.36, 29.46, 29.56, 29.64, 29.67, 31.09, 31.92, 36.07, 65.55 (q, 4.13 Hz), 65.83 (m), 65.89, 72.43, 86.69, 87.39 (t,  $J$  3.75 Hz), 104.70 (m), 117.71, 128.70, 132.70, 145.71, 147.51 (d, m,  $J_d$

151.25).  $^{19}\text{F}$ -NMR (376.5 MHz,  $\text{CDCl}_3$ )  $\delta$  -136.9 (m), -137.8 (m), -138.9 (m), -139.2 (m). EI-MS:  $m/z$ : 547.1 (30)  $[\text{M}]^+$ , 546.1 (96)  $[\text{M}]^+$ , 545.1 (31)  $[\text{M}]^+$ , 544.1 (95)  $[\text{M}]^+$ , 392.0 (25)  $[\text{M}-\text{C}_{11}\text{H}_{23}]^+$ , 390.9 (100)  $[\text{M}-\text{C}_{11}\text{H}_{23}]^+$ , 389.7 (27)  $[\text{M}-\text{C}_{11}\text{H}_{23}]^+$ , 388.7 (89)  $[\text{M}-\text{C}_{11}\text{H}_{23}]^+$ .  $\text{C}_{30}\text{H}_{29}\text{F}_4\text{Br}$  (545.45): calcd. C 66.06, H 5.36, found C 65.75, H 5.28.

**triisopropyl((4-((perfluorophenyl)buta-1,3-diynyl)phenyl)ethynyl)silane 19:** A mixture of bromoethynylpentafluorobenzene (0.29 g, 1.07 mmol), **7** (0.30 g, 1.07 mmol),  $\text{Pd}_2(\text{dba})_3\cdot\text{CHCl}_3$  (0.04 g, 0.04 mmol), CuI (0.015 g, 0.08 mmol), N-ethyldiisopropylamine (3 ml) and toluene (40 ml) was degassed with  $\text{N}_2$  and stirred for 4 hours at RT. Removal of solvents under reduced pressure and CC (silica gel, hexane) gave **19** (0.37 g, 0.78 mmol, 73%) as a colourless liquid.  $^1\text{H}$ -NMR (300 MHz,  $\text{CDCl}_3$ )  $\delta$  1.15 (s, 21H), 7.48 (q, 4H).  $^{13}\text{C}$ -NMR (75 MHz,  $\text{CDCl}_3$ )  $\delta$  11.35, 18.61, 65.45 (q, 3.97 Hz), 74.39, 84.67, 85.29 (q, 3.6 Hz), 94.58, 99.28 (m), 106.19, 120.42, 125.29, 132.08, 132.46, 137.76 (d, m,  $J_d$  248.2 Hz), 142.24 (d, m,  $J_d$  257.63 Hz), 148.34 (d, m,  $J_d$  253.5 Hz).  $^{19}\text{F}$ -NMR (376.5 MHz,  $\text{CDCl}_3$ )  $\delta$  -135.90, -151.51, -162.09. EI-MS: 70 eV (150 °C),  $m/z$  472.1 (15)  $[\text{M}]^+$ , 430.0 (30)  $[\text{M}-\text{C}_3\text{H}_6]^+$ , 429.0 (100)  $[\text{M}-\text{C}_3\text{H}_7]^+$ , 386.8 (34)  $[\text{M}-\text{C}_6\text{H}_{14}]^+$ , 373.0 (69)  $[\text{M}-\text{C}_3\text{H}_6-3\text{F}]^+$ .  $\text{C}_{27}\text{H}_{25}\text{F}_5\text{Si}$  (472.56): calcd. C 68.62, H 5.33; found C 68.59, H, 5.24.

**1-((4-ethynylphenyl)buta-1,3-diynyl)-2,3,4,5,6-pentafluorobenzene 20:** **19** (0.90 g, 1.9 mmol) and TBAF (0.7 g, 2.1 mmol) in wet THF (30 ml) was stirred at RT for 2 hours. Subsequent removal of solvent and CC (silic gel, hexane) yielded **20** (0.41 g, 1.3 mmol, 68%) as a brown solid.  $^1\text{H}$ -NMR (300 MHz,  $\text{CDCl}_3$ )  $\delta$  3.22 (s, 1H), 7.49 (q, 4H).  $^{13}\text{C}$ -NMR (75 MHz,  $\text{CDCl}_3$ )  $\delta$  65.59 (q), 74.50, 80.13, 82.78, 84.35, 85.15 (q), 99.26 (m), 121.10, 123.87, 132.19, 132.53, 137.80 (d, m,  $J_d$  250.1 Hz), 142.30 (d, m,  $J_d$  258.2 Hz), 148.43 (d, m,  $J_d$  254.3 Hz).  $^{19}\text{F}$ -NMR (376.5 MHz,  $\text{CDCl}_3$ )  $\delta$  -135.8, -151.3, -162.0). EI-MS: 70 eV (100 °C),  $m/z$ : 317.0 (19)  $[\text{M}]^+$ , 316.0 (100)  $[\text{M}]^+$ .  $\text{C}_{18}\text{H}_5\text{F}_5$  (316.22): calcd. C 68.37, H 1.59; found C 68.27, H 1.62.

**1-((4-dodecylphenyl)buta-1,3-diynyl)-2,3,5,6-tetrafluoro-4-((4-((perfluorophenyl)buta-1,3diynyl)**

**phenyl)buta-1,3-diynyl)benzene 4: 18** (0.12 g, 0.22 mmol), **20** (0.07 g, 0.22 mmol), Pd<sub>2</sub>(dba)<sub>3</sub>·CHCl<sub>3</sub> (0.04 g, 0.04 mmol) and CuI (0.015 g, 0.08 mmol) in N-ethyldiisopropylamine (1 ml) and toluene (25 ml) was degassed with N<sub>2</sub> and stirred at RT for 24 hours. After removal of solvent, CC (silica gel, hexane) and SEC (biobeads, toluene) provided **4** (94 mg, 0.12 mmol, 54%) as a slightly yellow solid. <sup>1</sup>H-NMR (300 MHz, CDCl<sub>3</sub>) δ 0.87 (t, 3H), 1.27 (br, 16H), 1.32 (m, 2H), 1.62 (m, 2H), 2.63 (t, 2H), 7.18 (d, 2H), 7.47 (d, 2H), 7.55 (s, 4H). <sup>13</sup>C-NMR (125 MHz, CDCl<sub>3</sub>) δ 14.00, 22.63, 29.20, 29.29, 29.40, 29.50, 29.59, 29.61, 30.99, 31.88, 36.06, 65.65, 66.24, 67.60, 72.48, 75.63, 75.78, 84.04, 85.05, 85.15, 86.83, 87.20, 88.10, 99.10 (m), 104.22 (m), 105.32 (m), 117.79, 122.36, 122.42, 128.72, 132.74, 137.70 (d, m, *J*<sub>d</sub> 251.4 Hz), 142.31 (d, m, *J*<sub>d</sub> 256.3 Hz), 145.79, 147.70 (d, m, *J*<sub>d</sub> 256.4 Hz), 148.30 (d, m, *J*<sub>d</sub> 255.2 Hz). <sup>19</sup>F-NMR (376.5 MHz, CDCl<sub>3</sub>) -137.0 (m), -137.5 (m), -152.2 (m), -163.2 (m) MALDI-ToF MS: m/z: 779.45 [M-H]<sup>+</sup>. C<sub>48</sub>H<sub>33</sub>F<sub>9</sub> (780.76): calcd. C 73.84, H 4.26, found C 73.45, H 4.35.

## References:

- [1] Shu, L.; Mu, Z.; Fuchs, H.; Chi, L.; Mayor, M. *Chem. Comm.* **2006**, 1862-1863.
- [2] Weil, T.; Reuther, E.; Beer, C.; Müllen, K. *Chem. Eur. J.* **2004**, *10*, 1398-1414.
- [3] Mu Z.; Shu L.; Fuchs H.; Mayor M. Chi L. *J. Am. Chem. Soc.* **2008**, *130*, 10840-10841.
